# Supplementary material for: Long-Term Influence of Laser-Processing Parameters on (Super)hydrophobicity Development and Stability of Stainless-Steel Surfaces
Source: PubMed Central journal article supplement (PMC6266256; doi:10.3390/ma11112240), 2018-11-11
Supplement: materials-11-02240-s001.pdf [file materials-11-02240-s001.pdf]

## Supporting Information

# Long-term influence of laser-processing parameters on (super)hydrophobicity development and stability of stainless-steel surfaces

Peter Gregorčič<sup>1\*</sup>, Marjetka Conradi<sup>2</sup>, Luka Hribar<sup>1</sup> and Matej Hočevar<sup>2</sup>

<sup>1</sup> Faculty of Mechanical Engineering, University of Ljubljana, Aškerčeva 6, 1000 Ljubljana, Slovenia

<sup>2</sup> Institute of metals and technology, Lepi pot 11, 1000 Ljubljana, Slovenia

\* Correspondence: peter.gregorcic@fs.uni-lj.si; Tel.: +386-1-477-1-172

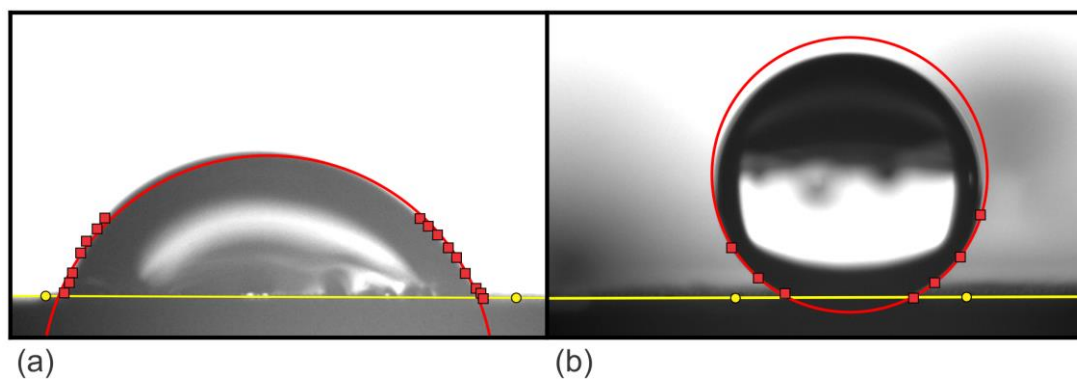

**Figure S1.** Determination of the static contact angle

The static contact angle was determined as shown in Figure S1. We fitted the line (in yellow) and the circle (in red) to the control points. The control points for the line are shown by the yellow circles and were manually added into the solid-gas interface. The control points for the liquid-gas interface (the red squares) were also manually added in such a way that the fitted circle corresponds to the liquid-gas interface in the vicinity of the contact points among all three phases: gas, liquid and solid. Two examples are shown in Figure S1: (a) fitting the apparent contact angle on an asymmetrical droplet ( $\theta = 68^\circ$ ); and (b) fitting the apparent contact angle in the case of a symmetrical droplet ( $\theta = 153^\circ$ ).

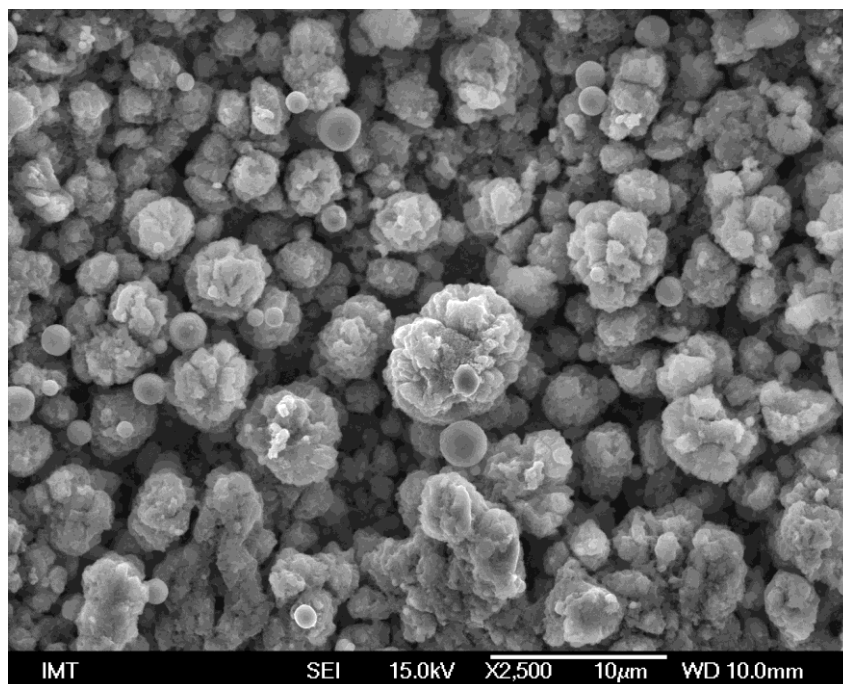

**Figure S2.** High-magnification SEM of S68

High-magnification image of the surface, processed by  $F_0 = 25.1 \text{ J/cm}^2$ , at  $\Delta x = \Delta y = 10 \text{ }\mu\text{m}$  (sample S68) is shown in Figure S2.

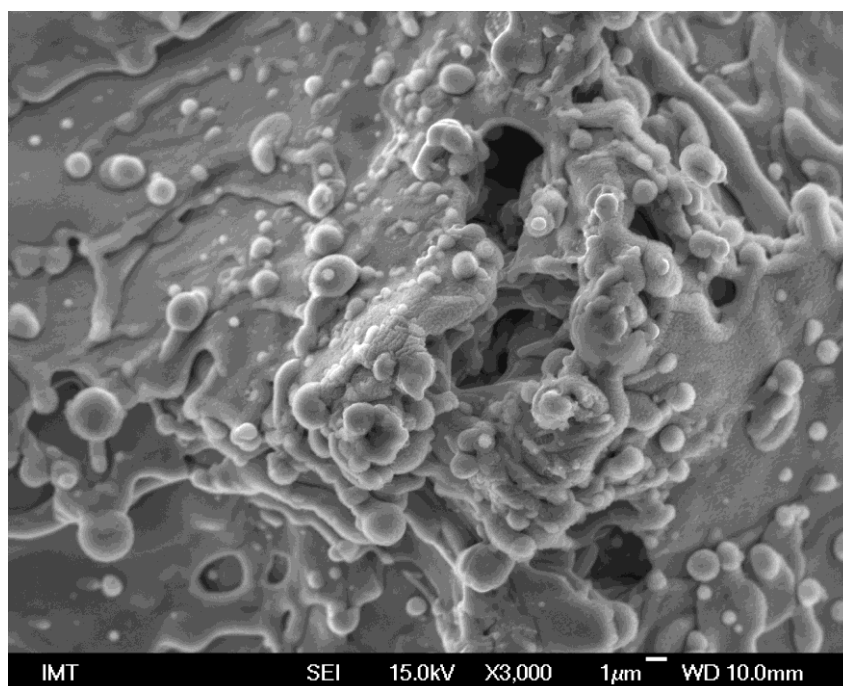

**Figure S3.** High-magnification SEM of S18

High-magnification SEM image of the surface, processed by  $F_0 = 12.1 \text{ J/cm}^2$ , at  $\Delta x = \Delta y = 50 \text{ }\mu\text{m}$  (sample S18) is shown in Figure S3.

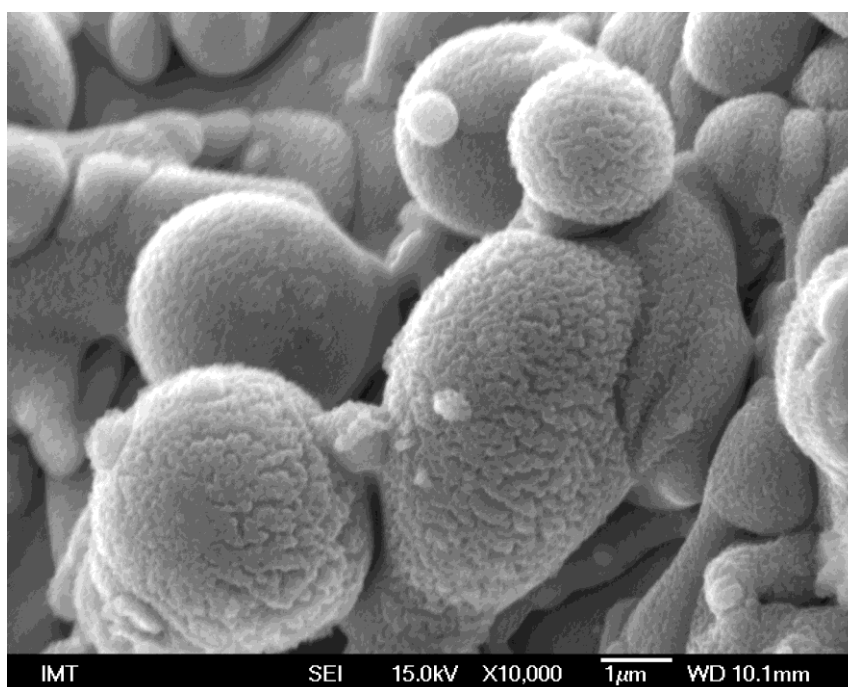

**Figure S4.** High-magnification SEM of S32.

High-magnification SEM image of the surface, processed by  $F_0 = 25.1 \text{ J/cm}^2$ , at  $\Delta x = \Delta y = 50 \text{ }\mu\text{m}$  (sample S32) is shown in Figure S4.

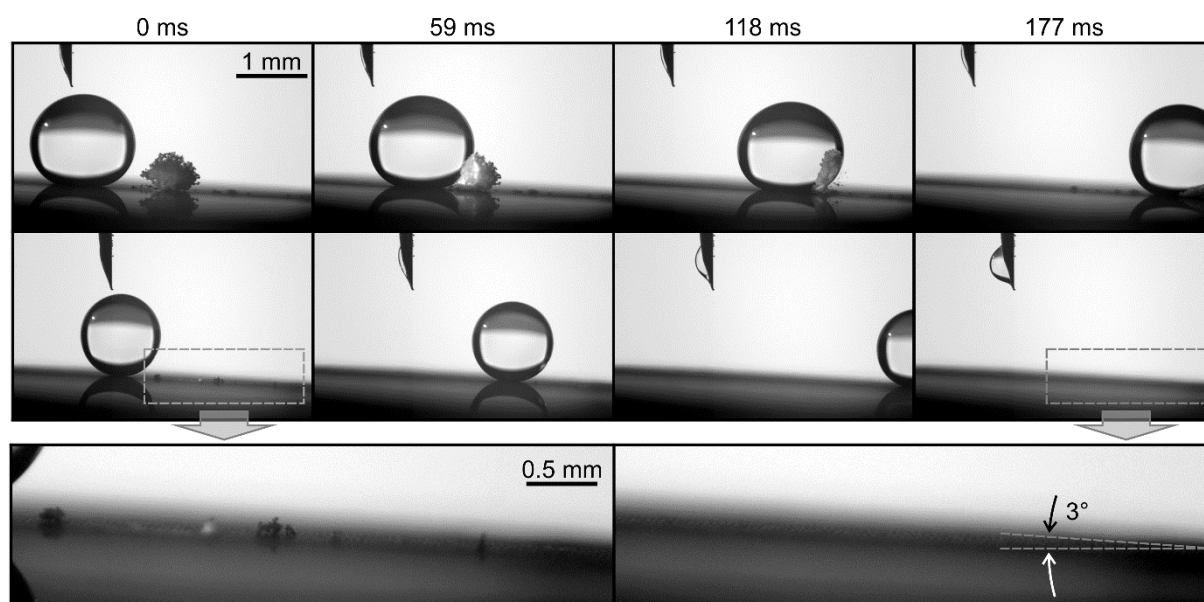

**Figure S5.** Self-cleaning effect

Self-cleaning effect on a laser-textured surface ( $F_0 = 25.1 \text{ J/cm}^2$ ,  $\Delta x = \Delta y = 10 \text{ mm}$ ) after one year of exposure to the atmospheric air is shown in Figure S5. The relative time that each image is captured is shown on the top of each image.

**Table S1:** Parameters of laser texturing with different fluences

| Sample label (texturing direction) | Average power [W] | Pulse energy [ $\mu$ J] | Peak fluence $F_0$ [ $\text{J cm}^{-2}$ ] |
|------------------------------------|-------------------|-------------------------|-------------------------------------------|
| S1 (0°/90°), S33 (0°)              | 1.1               | 44                      | 3.33                                      |
| S2 (0°/90°), S34 (0°)              | 1.2               | 48                      | 3.63                                      |
| S3 (0°/90°), S35 (0°)              | 1.4               | 56                      | 4.24                                      |
| S4 (0°/90°), S36 (0°)              | 1.5               | 60                      | 4.54                                      |
| S5 (0°/90°), S37 (0°)              | 1.6               | 64                      | 4.84                                      |
| S6 (0°/90°), S38 (0°)              | 1.8               | 72                      | 5.45                                      |
| S7 (0°/90°), S39 (0°)              | 1.9               | 76                      | 5.75                                      |
| S8 (0°/90°), S40 (0°)              | 2.1               | 84                      | 6.36                                      |
| S9 (0°/90°), S41 (0°)              | 2.2               | 88                      | 6.66                                      |
| S10 (0°/90°), S42 (0°)             | 2.4               | 96                      | 7.27                                      |
| S11 (0°/90°), S43 (0°)             | 2.6               | 104                     | 7.87                                      |
| S12 (0°/90°), S44 (0°)             | 2.9               | 116                     | 8.78                                      |
| S13 (0°/90°), S45 (0°)             | 3.1               | 124                     | 9.39                                      |
| S14 (0°/90°), S46 (0°)             | 3.3               | 132                     | 9.99                                      |
| S15 (0°/90°), S47 (0°)             | 3.5               | 140                     | 10.6                                      |
| S16 (0°/90°), S48 (0°)             | 3.8               | 152                     | 11.5                                      |
| S17 (0°/90°), S49 (0°)             | 3.9               | 156                     | 11.8                                      |
| S18 (0°/90°), S50 (0°)             | 4.0               | 160                     | 12.1                                      |
| S19 (0°/90°), S51 (0°)             | 4.7               | 188                     | 14.2                                      |
| S20 (0°/90°), S52 (0°)             | 5.0               | 200                     | 15.1                                      |
| S21 (0°/90°), S53 (0°)             | 5.2               | 208                     | 15.7                                      |
| S22 (0°/90°), S54 (0°)             | 5.7               | 228                     | 17.3                                      |
| S23 (0°/90°), S55 (0°)             | 6.0               | 240                     | 18.2                                      |
| S24 (0°/90°), S56 (0°)             | 6.4               | 256                     | 19.4                                      |
| S25 (0°/90°), S57 (0°)             | 6.8               | 272                     | 20.6                                      |
| S26 (0°/90°), S58 (0°)             | 7.0               | 280                     | 21.2                                      |
| S27 (0°/90°), S59 (0°)             | 7.1               | 284                     | 21.5                                      |
| S28 (0°/90°), S60 (0°)             | 7.4               | 296                     | 22.4                                      |
| S29 (0°/90°), S61 (0°)             | 7.5               | 300                     | 22.7                                      |
| S30 (0°/90°), S62 (0°)             | 7.8               | 312                     | 23.6                                      |
| S31 (0°/90°), S63 (0°)             | 8.1               | 324                     | 24.5                                      |
| S32 (0°/90°), S64 (0°)             | 8.3               | 332                     | 25.1                                      |

**Table S2:** Parameters of laser texturing with different scan line separations

| Sample | Parameter | Scan line separation                                       | Average power [W] | Pulse energy [ $\mu$ J] | Peak fluence $F_0$ [ $J\ cm^{-2}$ ] |
|--------|-----------|------------------------------------------------------------|-------------------|-------------------------|-------------------------------------|
| S65    |           | $0^\circ; \Delta x = 10\ \mu\text{m}$                      | 4.0               | 148                     | 12.1                                |
| S66    |           |                                                            | 8.3               | 332                     | 25.1                                |
| S67    |           | $0^\circ/90^\circ; \Delta x = \Delta y = 10\ \mu\text{m}$  | 4.0               | 148                     | 12.1                                |
| S68    |           |                                                            | 8.3               | 332                     | 25.1                                |
| S69    |           | $0^\circ; \Delta x = 25\ \mu\text{m}$                      | 4.0               | 148                     | 12.1                                |
| S70    |           |                                                            | 8.3               | 332                     | 25.1                                |
| S71    |           | $0^\circ/90^\circ; \Delta x = \Delta y = 25\ \mu\text{m}$  | 4.0               | 148                     | 12.1                                |
| S72    |           |                                                            | 8.3               | 332                     | 25.1                                |
| S73    |           | $0^\circ; \Delta x = 100\ \mu\text{m}$                     | 4.0               | 148                     | 12.1                                |
| S74    |           |                                                            | 8.3               | 332                     | 25.1                                |
| S75    |           | $0^\circ/90^\circ; \Delta x = \Delta y = 100\ \mu\text{m}$ | 4.0               | 148                     | 12.1                                |
| S76    |           |                                                            | 8.3               | 332                     | 25.1                                |
| S77    |           | $0^\circ; \Delta x = 200\ \mu\text{m}$                     | 4.0               | 148                     | 12.1                                |
| S78    |           |                                                            | 8.3               | 332                     | 25.1                                |
| S79    |           | $0^\circ/90^\circ; \Delta x = \Delta y = 200\ \mu\text{m}$ | 4.0               | 148                     | 12.1                                |
| S80    |           |                                                            | 8.3               | 332                     | 25.1                                |

**Table S3:** Parameters of laser texturing at different focal positions

| Sample       | Parameter | Focal position $\Delta z$ [ $\mu\text{m}$ ] | Scan line separation                                      | Average power [W] | Pulse energy [ $\mu$ J] | Pulse fluence $F$ [ $J\ \text{cm}^{-2}$ ] |
|--------------|-----------|---------------------------------------------|-----------------------------------------------------------|-------------------|-------------------------|-------------------------------------------|
| S81, S83-S86 |           | 0                                           | $0^\circ/90^\circ; \Delta x = \Delta y = 50\ \mu\text{m}$ | 4.0               | 156                     | 12.1                                      |
| S82          |           | -600                                        |                                                           |                   |                         |                                           |

The parameters of laser texturing at different focal positions and for testing wetting behavior as a function of the wetting period are given in Table S3.

**Table S4:** Parameters of laser texturing for determination of the threshold fluence for laser ablation

| Scan line<br>separation $\Delta x$<br>[ $\mu\text{m}$ ] | Average<br>power<br>[W] | Pulse energy<br>[ $\mu\text{J}$ ] | Peak fluence<br>$F_0$<br>[ $\text{J cm}^{-2}$ ] | $\mu$ -channel<br>diameter $D_\mu$<br>[ $\mu\text{m}$ ] |
|---------------------------------------------------------|-------------------------|-----------------------------------|-------------------------------------------------|---------------------------------------------------------|
| 50                                                      | 1.49                    | 60                                | 4.51                                            | 16                                                      |
| 50                                                      | 2.24                    | 90                                | 6.78                                            | 32                                                      |
| 100                                                     | 3.7                     | 148                               | 11.2                                            | 42                                                      |
| 50                                                      | 3.95                    | 158                               | 12.0                                            | 43                                                      |
| 100                                                     | 8.3                     | 332                               | 25.1                                            | 57                                                      |

The parameters of laser texturing ( $0^\circ$ ) at different fluences for surfaces that were evaluated for the determination of the threshold fluence for laser ablation are given in Table S4. The diameters of the  $\mu$ -channels  $D_\mu$ , measured from SEM images are also listed.
